# Supplementary material for: The longer the worse: a combined proteomic and targeted study of the long-termversusshort-term effects of silver nanoparticles on macrophages
Source: Royal Society of Chemistry journal article supplement (doi:10.1039/c9en01329f), 2020-01-01
Supplement: c9en01329f1.pdf [file c9en01329f1.pdf]

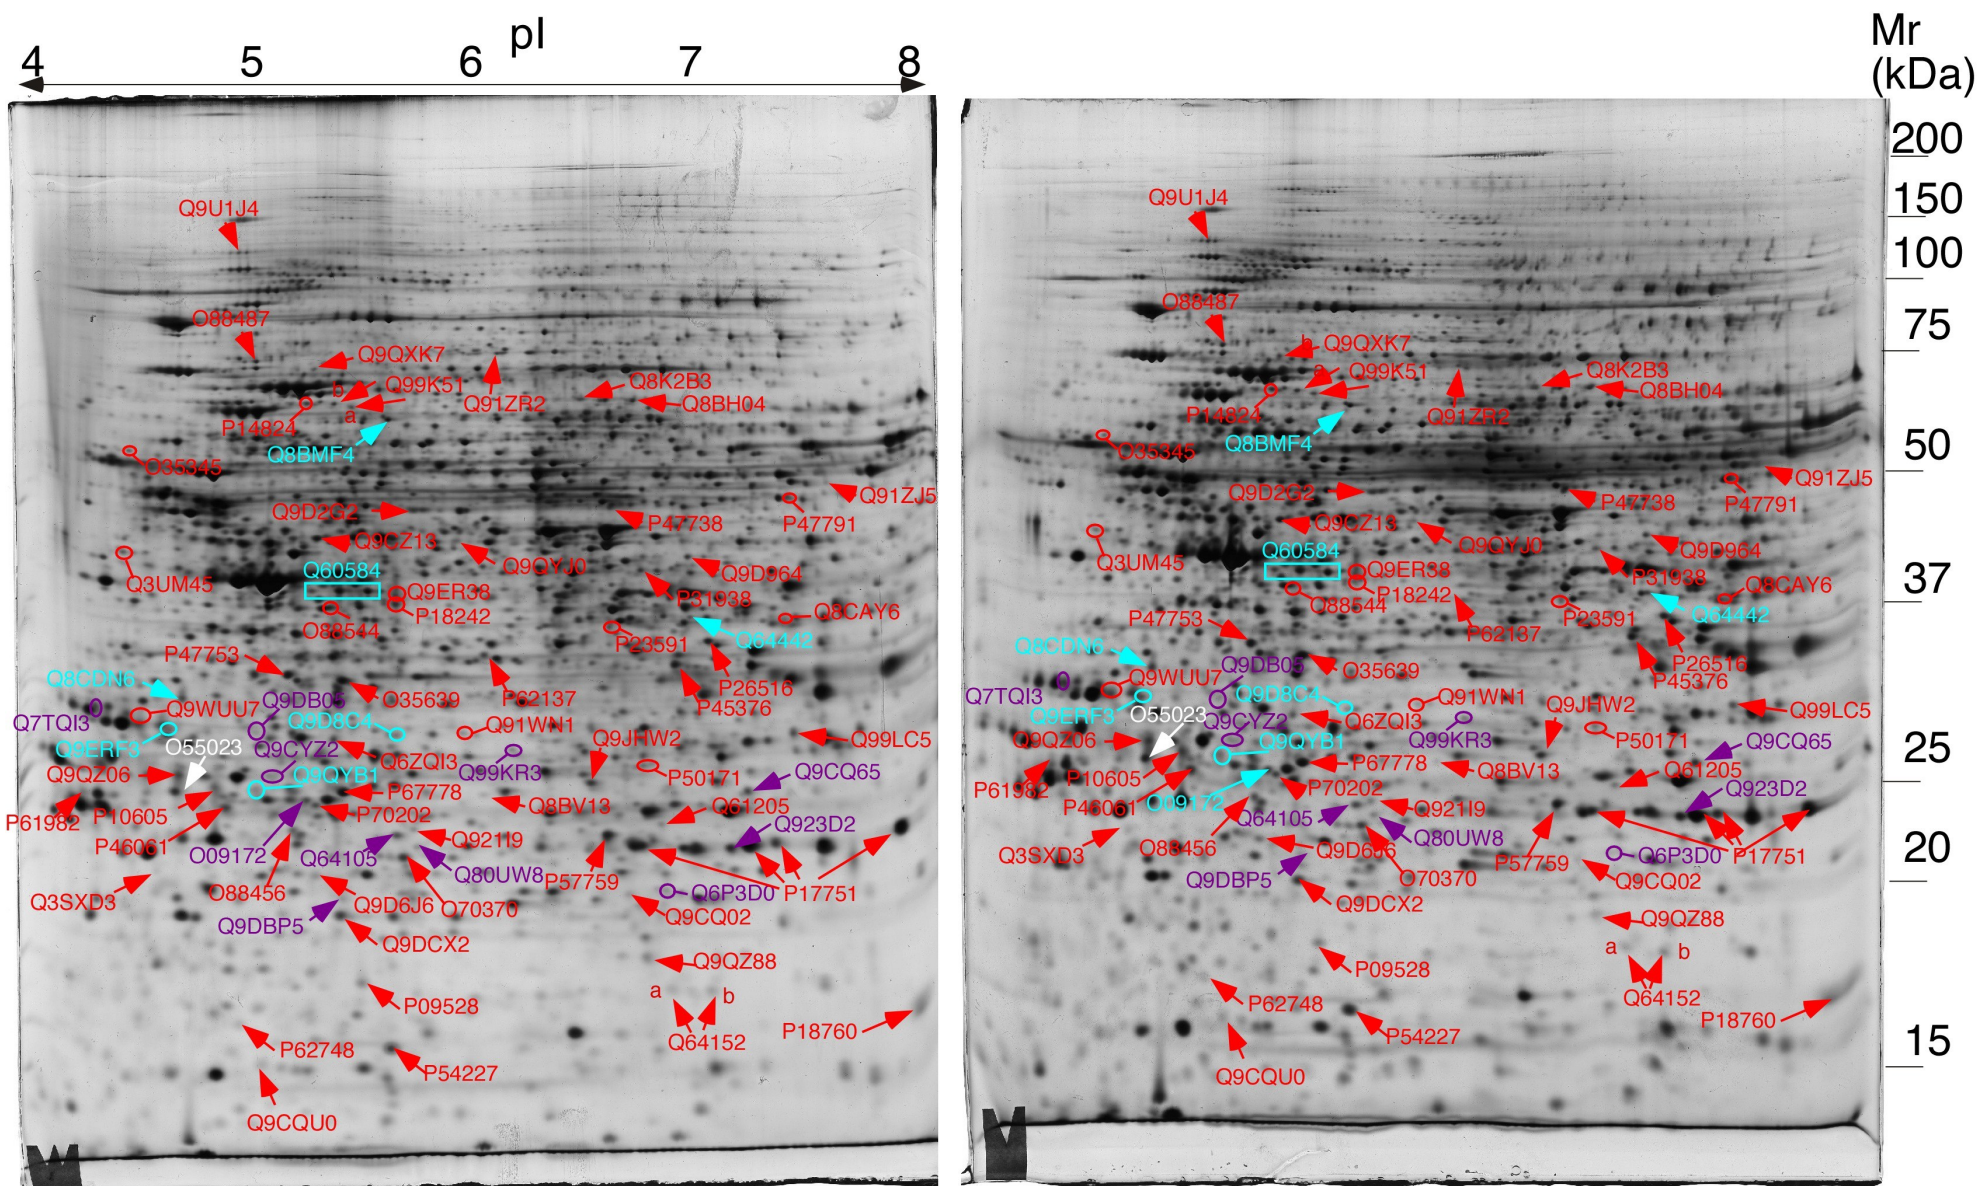

Control (acute)

AgNP acutely exposed

Supplementary Figure 1: 2D gel analysis for the acute exposure condition
