# Supplementary material for: The longer the worse: a combined proteomic and targeted study of the long-termversusshort-term effects of silver nanoparticles on macrophages
Source: Royal Society of Chemistry journal article supplement (doi:10.1039/c9en01329f), 2020-01-01
Supplement: c9en01329f2.pdf [file c9en01329f2.pdf]

Supplementary Figure 4: 2D gel analysis for the chronic exposure condition

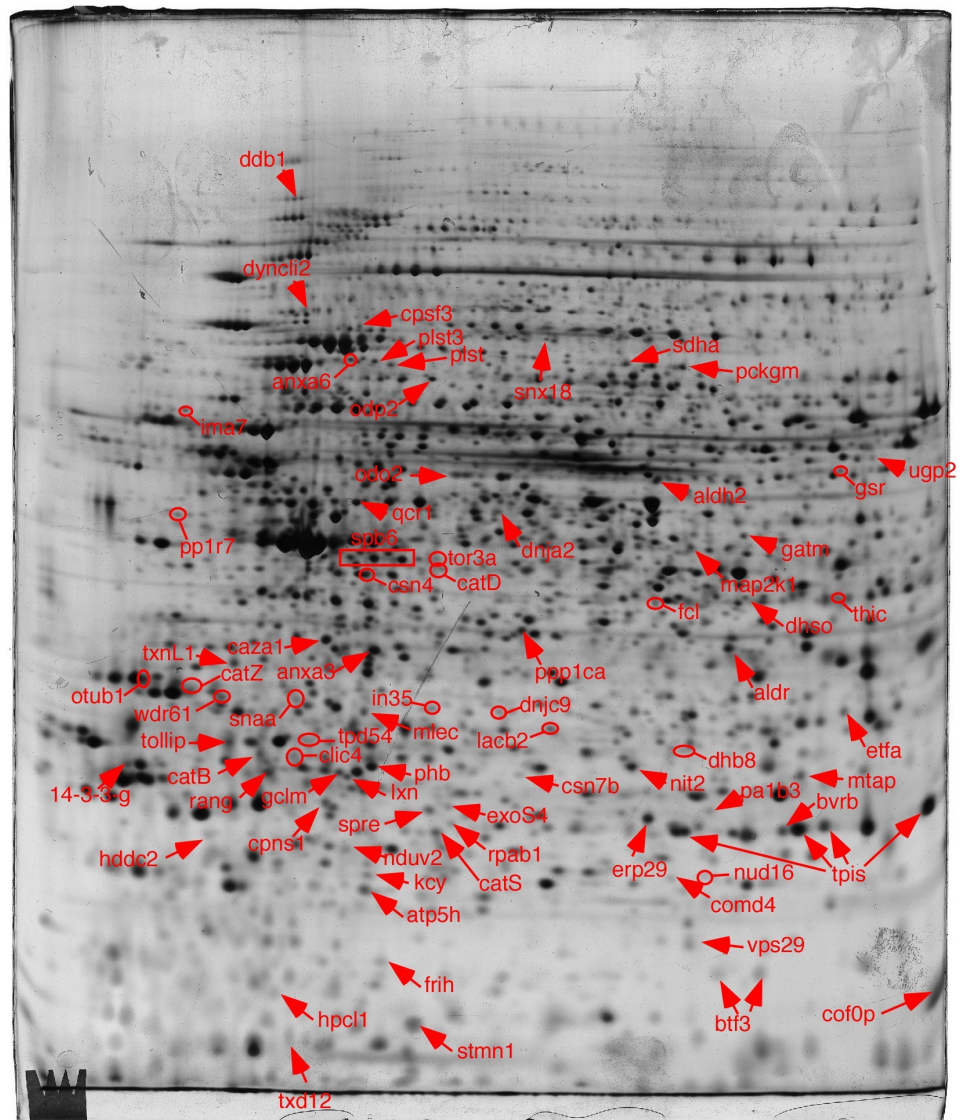

Control (chronic)

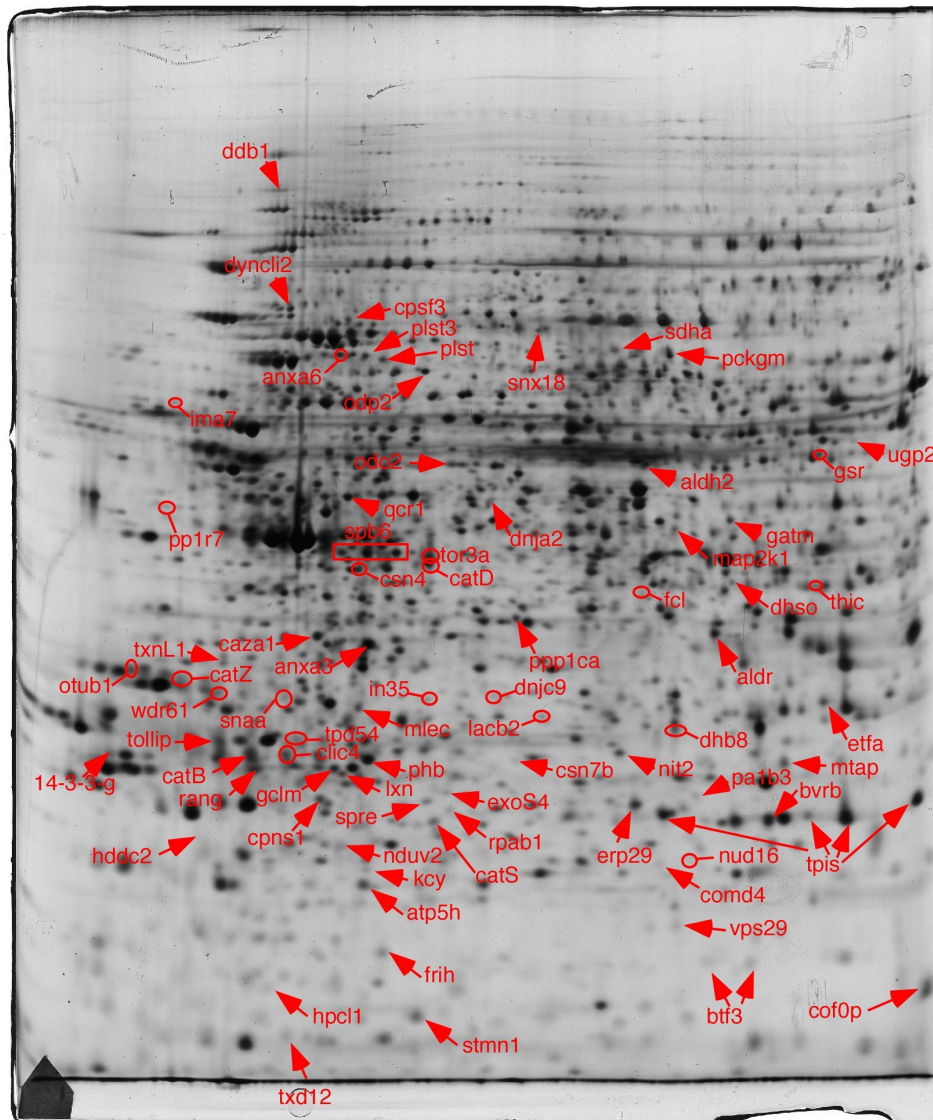

## AgNP chronically exposed
