# Supplementary material for: The longer the worse: a combined proteomic and targeted study of the long-termversusshort-term effects of silver nanoparticles on macrophages
Source: Royal Society of Chemistry journal article supplement (doi:10.1039/c9en01329f), 2020-01-01
Supplement: c9en01329f3.pdf [file c9en01329f3.pdf]

### Supplementary Table 1 : Cellular uptake of nanoparticles

Cells were grown to confluence in 25 cm<sup>2</sup> culture flasks (medium volume 5 ml). Silver nanoparticles were then added at 1 or 20 ppm, and the flasks were incubated at 37°C for 24 hours. The medium was recovered and the cell layer rinsed once with 5ml of culture medium. The cells were then scraped in 5ml of buffer A (Hepes 50 mM pH 7.5, sorbitol 200 mM, magnesium acetate 2 mM). Aliquots of the recovered culture medium and of the cell suspension were mineralized by the addition of one volume of suprapure 65% HNO<sub>3</sub> and incubation on a rotating wheel at room temperature for 18 h. The silver content was measured by ICPMS. The results are expressed in ppb silver in the initial samples. The experiment was carried out on independent biological triplicates.

|               | 20 ppm Ag NP |        |                           | 1 ppm Ag NP |        |                           |
|---------------|--------------|--------|---------------------------|-------------|--------|---------------------------|
|               | cell layer   | medium | fraction<br>in cell layer | cell layer  | medium | fraction<br>in cell layer |
| mean          | 7744         | 2411   | 0.75                      | 744         | 265    | 0.73                      |
| std deviation | 3062         | 196    | 0.07                      | 158         | 41     | 0.06                      |
